# Supplementary material for: Schwann Cell-Like Cells Derived from Human Amniotic Mesenchymal Stem Cells Promote Peripheral Nerve Regeneration through a MicroRNA-214/c-Jun Pathway
Source: Hindawi journal article supplement (doi:10.1155/2019/2490761), 2019-07-01
Supplement: f1 [file 2490761.f1.pdf]

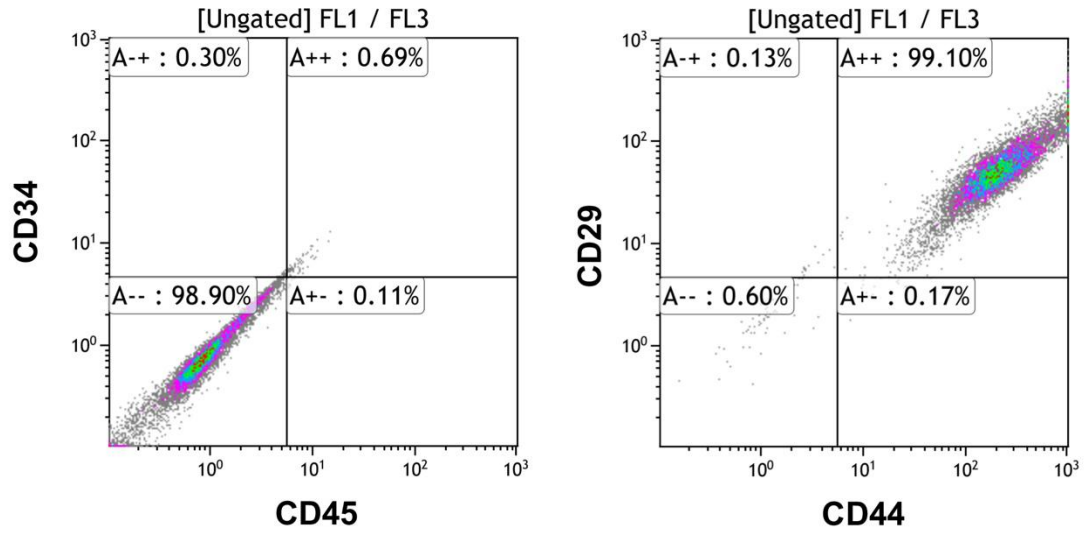

Supplementary Figure 1. Flow cytometry analysis of CD34, CD45, CD29 and CD44 markers in hAMSCs.
